# Supplementary material for: Cortical free-water imaging in familial frontotemporal dementia associated with MAPT, GRN, and C9orf72 pathogenic variants
Source: Research Square preprint supplement (doi:10.21203/rs.3.rs-9677636/v1), 2026-05-25
Supplement: Supplementary file 1 [file da03473f5e4ccf67252606a5.docx]

**Supplementary Table 1 Demographic and clinical data for participants**

| Parameter | C9orf72 | GRN | MAPT | Non-carriers | Pvalue | C9 vs GRN (*P* value) | C9 vs MAPT (*P* value) | C9 vs Non-carriers (*P* value) | GRN vs MAPT (*P* value) | GRN vs Non-carriers (*P* value) | MAPT vs Non-carriers (*P* value) |
| --- | --- | --- | --- | --- | --- | --- | --- | --- | --- | --- | --- |
|  | (N=85) | (N=56) | (N=58) | (N=125) |  |  |  |  |  |  |  |
| Age at visit, years |  |  |  |  | <0.001 | 0.026 | 0.089 | 0.957 | <0.001 | 0.003 | 0.166 |
| Mean (SD) | 48.5 (13.9) | 55.2 (14.6) | 42.9 (13.1) | 47.5 (13.9) |  |  |  |  |  |  |  |
| Median [Min, Max] | 50 [19.0, 75.0] | 59.6 [22.0, 80.0] | 43.5 [18.0, 68.0] | 49.0 [18.0, 76.0] |  |  |  |  |  |  |  |
| Sex, n (%) |  |  |  |  | 0.883 |  |  |  |  |  |  |
| F | 46 (54.1%) | 29 (51.8%) | 31 (53.4%) | 72 (57.6%) |  |  |  |  |  |  |  |
| M | 39 (45.9%) | 27 (48.1%) | 27 (46.6%) | 53 (42.4%) |  |  |  |  |  |  |  |
| Age at onset (symptomatic participants only), years |  |  |  |  | <0.001 |  |  |  |  |  |  |
| Mean (SD) | 49.6 (12.2) | 57.4 (11.2) | 45.3 (11.0) | NA |  | 0.039 | 0.502 | NA | 0.003 | NA | NA |
| Median [Min, Max] | 52.0 [12.0, 71.0] | 60.0 [22.0, 72.0] | 45.5 [16.0, 60.0] | NA |  |  |  |  |  |  |  |
| Missing | 42 (49.4%) | 30 (53.6%) | 36 (62.1%) | NA |  |  |  |  |  |  |  |
| Education, years |  |  |  |  | 0.993 | 0.993 | 1.000 | 0.997 | 0.998 | 0.999 | 1.000 |
| Mean (SD) | 15.6 (2.30) | 15.5 (2.76) | 15.6 (2.62) | 15.6 (2.35) |  |  |  |  |  |  |  |
| Median [Min, Max] | 16.0 [10.0, 20.0] | 16.0 [10.0, 20.0] | 16.0 [10.0, 22.0] | 16.0 [12.0, 20.0] |  |  |  |  |  |  |  |
| Primary clinical phenotype, n (%) |  |  |  |  | <0.001 |  |  |  |  |  |  |
| Amyotrophic lateral sclerosis | 5 (5.9%) | 0 (0%) | 0 (0%) | 0 (0%) |  |  |  |  |  |  |  |
| Behavioral variant frontotemporal dementia | 19 (22.4%) | 8 (14.3%) | 14 (24.1%) | 0 (0%) |  |  |  |  |  |  |  |
| Clinically normal | 44 (51.8%) | 31 (55.4%) | 36 (62.1%) | 125 (100%) |  |  |  |  |  |  |  |
| Clinically NOT normal, not neurodegenerative | 1 (1.2%) | 0 (0%) | 0 (0%) | 0 (0%) |  |  |  |  |  |  |  |
| FTD/ALS | 1 (1.2%) | 0 (0%) | 0 (0%) | 0 (0%) |  |  |  |  |  |  |  |
| MCI -behavior | 2 (2.4%) | 2 (3.6%) | 3 (5.2%) | 0 (0%) |  |  |  |  |  |  |  |
| MCI——cognitive subtype (aMCI/ naMCI; single- vs multiple-domain) | 6 (7.1%) | 2 (3.6%) | 1 (1.7%) | 0 (0%) |  |  |  |  |  |  |  |
| Other, specify | 5 (5.9%) | 2 (3.6%) | 0 (0%) | 0 (0%) |  |  |  |  |  |  |  |
| Primary progressive aphasia - agrammatic/ nonfluent variant subtype | 1 (1.2%) | 6 (10.7%) | 0 (0%) | 0 (0%) |  |  |  |  |  |  |  |
| Primary progressive aphasia - semantic variant subtype | 1 (1.2%) | 1 (1.8%) | 0 (0%) | 0 (0%) |  |  |  |  |  |  |  |
| Alzheimer's disease dementia | 0 (0%) | 1 (1.8%) | 2 (3.4%) | 0 (0%) |  |  |  |  |  |  |  |
| Corticobasal syndrome - typical or variant | 0 (0%) | 2 (3.6%) | 0 (0%) | 0 (0%) |  |  |  |  |  |  |  |
| Primary progressive aphasia - logopenic variant subtype | 0 (0%) | 1 (1.8%) | 0 (0%) | 0 (0%) |  |  |  |  |  |  |  |
| MCI-language | 0 (0%) | 0 (0%) | 1 (1.7%) | 0 (0%) |  |  |  |  |  |  |  |
| Primary psychiatric disorder - Mood | 0 (0%) | 0 (0%) | 1 (1.7%) | 0 (0%) |  |  |  |  |  |  |  |
| MoCA |  |  |  |  | 0.003 |  |  |  |  |  |  |
| Mean (SD) | 25.7 (11.4) | 22.8 (8.16) | 25.2 (5.48) | 27.2 (2.24) |  | 0.099 | 0.982 | 0.486 | 0.289 | 0.001 | 0.344 |
| Median [Min, Max] | 26.0 [0, 30.0] | 27.0 [2.00, 30.0] | 27.0 [6.00, 30.0] | 28.0 [19.0, 30.0] |  |  |  |  |  |  |  |
| MEMORY |  |  |  |  | <0.001 |  |  |  |  |  |  |
| Mean (SD) | 0.312 (0.582) | 0.375 (0.627) | 0.233 (0.506) | 0 (0) |  | 0.846 | 0.731 | <0.001 | 0.331 | <0.001 | 0.007 |
| Median [Min, Max] | 0 [0, 2.00] | 0 [0, 2.00] | 0 [0, 2.00] | 0 [0, 0] |  |  |  |  |  |  |  |
| ORIENT |  |  |  |  | <0.001 |  |  |  |  |  |  |
| Mean (SD) | 0.212 (0.542) | 0.357 (0.705) | 0.164 (0.379) | 0 (0) |  | 0.211 | 0.916 | 0.003 | 0.008 | <0.001 | 0.008 |
| Median [Min, Max] | 0 [0, 3.00] | 0 [0, 3.00] | 0 [0, 2.00] | 0 [0, 0] |  |  |  |  |  |  |  |
| JUDGMENT |  |  |  |  | <0.001 |  |  |  |  |  |  |
| Mean (SD) | 0.512 (0.813) | 0.536 (0.836) | 0.379 (0.703) | 0 (0) |  | 0.996 | 0.590 | <0.001 | 0.531 | <0.001 | <0.001 |
| Median [Min, Max] | 0 [0, 3.00] | 0 [0, 3.00] | 0 [0, 2.00] | 0 [0, 0] |  |  |  |  |  |  |  |
| COMMUN |  |  |  |  | <0.001 |  |  |  |  |  |  |
| Mean (SD) | 0.371 (0.695) | 0.473 (0.800) | 0.276 (0.571) | 0 (0) |  | 0.691 | 0.735 | <0.001 | 0.213 | <0.001 | 0.008 |
| Median [Min, Max] | 0 [0, 3.00] | 0 [0, 3.00] | 0 [0, 2.00] | 0 [0, 0] |  |  |  |  |  |  |  |
| HOMEHOBB |  |  |  |  | <0.001 |  |  |  |  |  |  |
| Mean (SD) | 0.400 (0.743) | 0.491 (0.817) | 0.241 (0.489) | 0 (0) |  | 0.771 | 0.329 | <0.001 | 0.074 | <0.001 | 0.031 |
| Median [Min, Max] | 0 [0, 3.00] | 0 [0, 3.00] | 0 [0, 2.00] | 0 [0, 0] |  |  |  |  |  |  |  |
| PERSCARE |  |  |  |  | <0.001 |  |  |  |  |  |  |
| Mean (SD) | 0.224 (0.624) | 0.214 (0.563) | 0.155 (0.365) | 0 (0) |  | 0.999 | 0.780 | 0.001 | 0.880 | 0.010 | 0.101 |
| Median [Min, Max] | 0 [0, 3.00] | 0 [0, 3.00] | 0 [0, 1.00] | 0 [0, 0] |  |  |  |  |  |  |  |
| CDRSUM |  |  |  |  | <0.001 |  |  |  |  |  |  |
| Mean (SD) | 2.03 (3.63) | 2.45 (4.12) | 1.45 (2.70) | 0 (0) |  | 0.818 | 0.607 | <0.001 | 0.220 | <0.001 | 0.006 |
| Median [Min, Max] | 0 [0, 17.0] | 0 [0, 16.0] | 0 [0, 9.00] | 0 [0, 0] |  |  |  |  |  |  |  |
| CDRGLOB |  |  |  |  | <0.001 |  |  |  |  |  |  |
| Mean (SD) | 0.365 (0.614) | 0.446 (0.761) | 0.216 (0.364) | 0 (0) |  | 0.745 | 0.025 | <0.001 | 0.046 | <0.001 | 0.022 |
| Median [Min, Max] | 0 [0, 3.00] | 0 [0, 3.00] | 0 [0, 1.00] | 0 [0, 0] |  |  |  |  |  |  |  |
| COMPORT |  |  |  |  | <0.001 |  |  |  |  |  |  |
| Mean (SD) | 0.529 (0.825) | 0.473 (0.741) | 0.371 (0.632) | 0 (0) |  | 0.945 | 0.387 | <0.001 | 0.787 | <0.001 | <0.001 |
| Median [Min, Max] | 0 [0, 3.00] | 0 [0, 3.00] | 0 [0, 2.00] | 0 [0, 0] |  |  |  |  |  |  |  |
| CDRLANG |  |  |  |  | <0.001 |  |  |  |  |  |  |
| Mean (SD) | 0.229 (0.543) | 0.393 (0.773) | 0.181 (0.446) | 0 (0) |  | 0.174 | 0.928 | 0.0003 | 0.073 | <0.001 | 0.069 |
| Median [Min, Max] | 0 [0, 3.00] | 0 [0, 3.00] | 0 [0, 2.00] | 0 [0, 0] |  |  |  |  |  |  |  |
| FTLD-CDR Global |  |  |  |  | <0.001 |  |  |  |  |  |  |
| Mean (SD) | 0.553 (0.824) | 0.589 (0.859) | 0.440 (0.726) | 0 (0) |  | 0.987 | 0.718 | <0.001 | 0.586 | <0.001 | <0.001 |
| Median [Min, Max] | 0 [0, 3.00] | 0 [0, 3.00] | 0 [0, 2.00] | 0 [0, 0] |  |  |  |  |  |  |  |
| FTLD-CDR sum of boxes |  |  |  |  | <0.001 |  |  |  |  |  |  |
| Mean (SD) | 2.79 (4.82) | 3.31 (5.34) | 2.00 (3.58) | 0 (0) |  | 0.838 | 0.583 | <0.001 | 0.221 | <0.001 | 0.003 |
| Median [Min, Max] | 0 [0, 22.0] | 0 [0, 21.0] | 0 [0, 12.0] | 0 [0, 0] |  |  |  |  |  |  |  |
| Plasma NfL, pg/mL |  |  |  |  | <0.001 |  |  |  |  |  |  |
| Mean (SD) | 18.8 (24.4) | 26.0 (29.0) | 9.89 (7.67) | 6.85 (3.80) |  | 0.106 | 0.026 | <0.001 | <0.001 | <0.001 | 0.735 |
| Median [Min, Max] | 8.97 [2.57, 122] | 10.6 [2.28, 95.4] | 6.95 [1.89, 32.6] | 6.10 [1.46, 23.7] |  |  |  |  |  |  |  |
| Missing | 4 (4.7%) | 2 (3.6%) | 4 (6.9%) | 10 (8.0%) |  |  |  |  |  |  |  |

Note. Values are presented as mean (SD), median [min, max], or n (%), as indicated. Overall group differences were assessed using ANOVA or Kruskal–Wallis tests for continuous variables and χ² or Fisher’s exact tests for categorical variables, as appropriate. Pairwise comparisons were performed using post-hoc tests with multiplicity adjustment (specify method). Age at onset was summarized among symptomatic participants with available onset data; it is not applicable to clinically normal participants and non-carriers.
